# Supplementary material
Source: HighWire-hosted journal article supplement (http://rc.rcjournal.com/highwire/filestream/12341/field_highwire_adjunct_files/6/suppl7.docx)
Supplement: suppl7.docx [file suppl7.docx]

**SUPPLEMENTAL DIGITAL CONTENT 7**

Table 1 – In-hospital follow-up (n= 71 patients)

|  | Control group  (n=35) | Treatment group (n=36) |
| --- | --- | --- |
| ICU Dead, No. (%) | 12 (34) | 9 (25) |
| Hospital Dead, No. (%) | 12 (34) | 11 (31) |
| Ventilator-free days, median [IQR] | 17.1 [0 – 23.5] | 16.5 [0 – 23.4] |
| VAP, clinical diagnosis, No. (%) | 3 (9) | 4 (11) |
| ICU Length of Stay, median [IQR] | 13 [8.8 – 21] | 15.5 [8.1 – 22] |
| Hospital Length of Stay, median [IQR] | 21 [12 – 30] | 22.5 [13.9 – 36] |
| Tracheostomy, No. (%) | 9 (26) | 7 (19) |

ICU: Intensive Care Unit; IQR: Interquartile Range; VAP: Ventilator-Associated Pneumonia; VAE: Ventilator-Associated Event

Table 2 - Staff Feedback Survey

| 1) Did you experience any adverse event? | | | | | | | |
| --- | --- | --- | --- | --- | --- | --- | --- |
| Yes: 0/28  0% | | | | No: 28/28  100% | | | |
| 2) Ease of setup and use was: | | | | | | | |
| Excellent: 11/28  39% | | Good: 13/28  46% | | Fair: 4/28  14% | | Poor: 0/28  0% | |
| 3) Do you generally perceive secretion removal as a problem: | | | | | | | |
| Yes: 24/28  86% | | | | No: 4/28  14% | | | |
| 4) How do you compare endOclear to standard suctioning? | | | | | | | |
| Much better: 4/28  14% | | Better: 19/28  68% | | The same 5/28  18% | | Worse/Much Worse: 0/28  0% | |
| 5) Compared to what expected, the amount of secretions removed was: | | | | | | | |
| More: 13/28  46% | | Equal: 9/28  32% | | Less: 6/28  21% | | Don’t know: 0/28  0% | |
| 6) Would you recommend endOclear cleaning in all intubated patients? | | | | | | | |
| Yes: 15/28  54% | | | | No: 13/28  46% | | | |
| 7) In which category of patients do you think it would be useful? | | | | | | | |
| Nobody:  1/28  (4%) | Post-Surgery 0/28 | | Medical ICU 5/28  (18%) | COPD  3/28  (11%) | Acute Respiratory Failure: 2/28 | | Any patient ventilated for more than 48h: 10/28 |
| 8) Average score from 1-10: | | | | | | | |
| 7.1±2.1 | | | | | | | |
| Relevant comments:   - It should be used as a “rescue” system - Would be better with a closed circuit system (2 comments) - Effective at removing ETT plugs and casts - Helpful in avoiding endotracheal tube exchange for mucous plugs | | | | | | | |
